# Supplementary material for: Influence of molecular weight on PNIPAM brush modified colloidal silica particles
Source: Royal Society of Chemistry journal article supplement (doi:10.1039/c8sm01824c), 2018-12-03
Supplement: c8sm01824c1.pdf [file c8sm01824c1.pdf]

## Electronic supplementary information

### Influence of Molecular Weight on PNIPAM Brush Modified Colloidal Silica Particles

Ben A. Humphreys,<sup>1</sup> Stuart W. Prescott,<sup>2</sup> Timothy J. Murdoch,<sup>1</sup> Andrew Nelson,<sup>3</sup>  
Elliot Gilbert,<sup>3</sup> Grant B. Webber,<sup>1</sup> Erica J. Wanless<sup>1</sup>

<sup>1</sup> Priority Research Centre for Advanced Particle Processing and Transport, University of Newcastle,  
Callaghan, NSW 2308, Australia

<sup>2</sup> School of Chemical Engineering, UNSW Sydney, NSW 2052, Australia

<sup>3</sup> Australian Centre for Neutron Scattering, ANSTO, Lucas Heights, NSW 2234, Australia

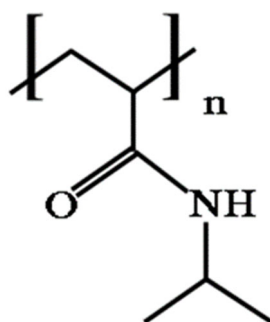

**Figure S1.** Molecular structure of poly(*N*-isopropylacrylamide) (PNIPAM).

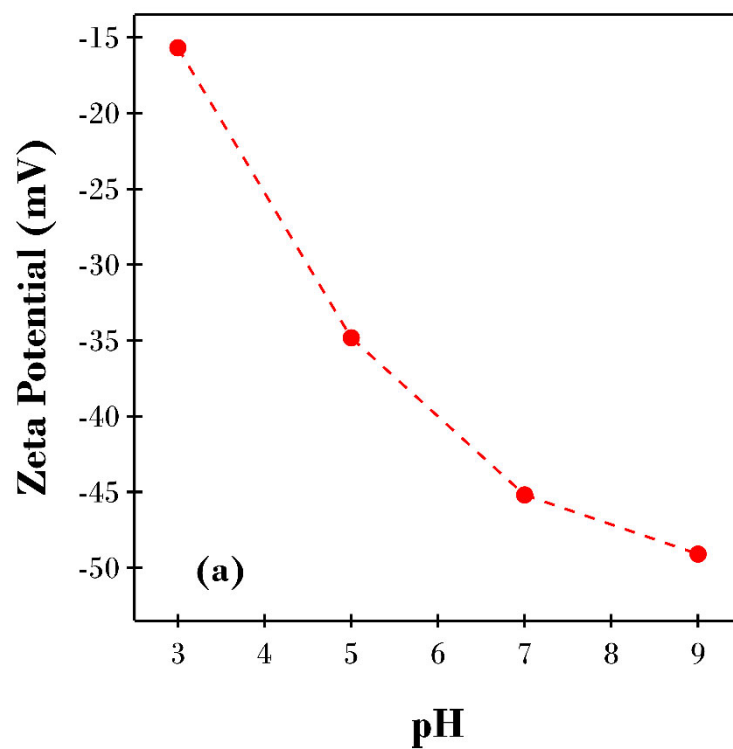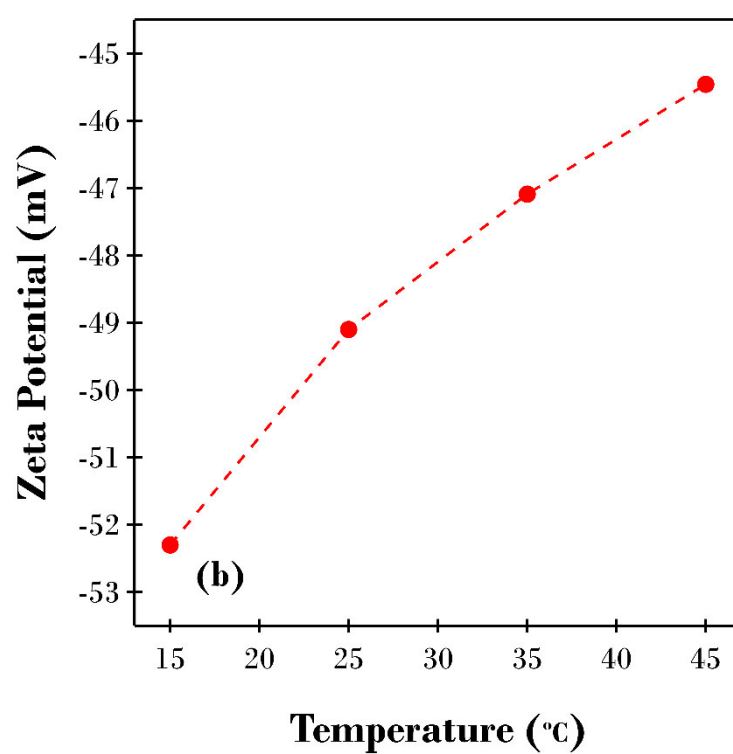

**Figure S2.** Zeta potential of the core silica particles (a) as a function of solution pH at 25 °C and (b) as a function of temperature at pH 9.

## Details of Approach to Modelling Temperature Dependent Hydrodynamic Data of Modified Particles in Water

Owing to the unusual shape of the intensity average hydrodynamic diameter ( $D_{\text{hyd}}$ ) as a function of temperature, a simple analytical model, such as a sigmoidal fit, was not adequate to calculate the mid-point temperature used to define the LCST. To accurately determine this temperature, equations SE1 to SE25 (detailed in Table S1) were used to model the increasing temperature results (15 to 45 °C) for the five PNIPAM brush modified samples displayed in Figure 2 of the main manuscript.<sup>1</sup> This enabled the maximum, minimum and mid-point  $D_{\text{hyd}}$  to be defined (Figure S3 shows the results for the 1 hr sample).

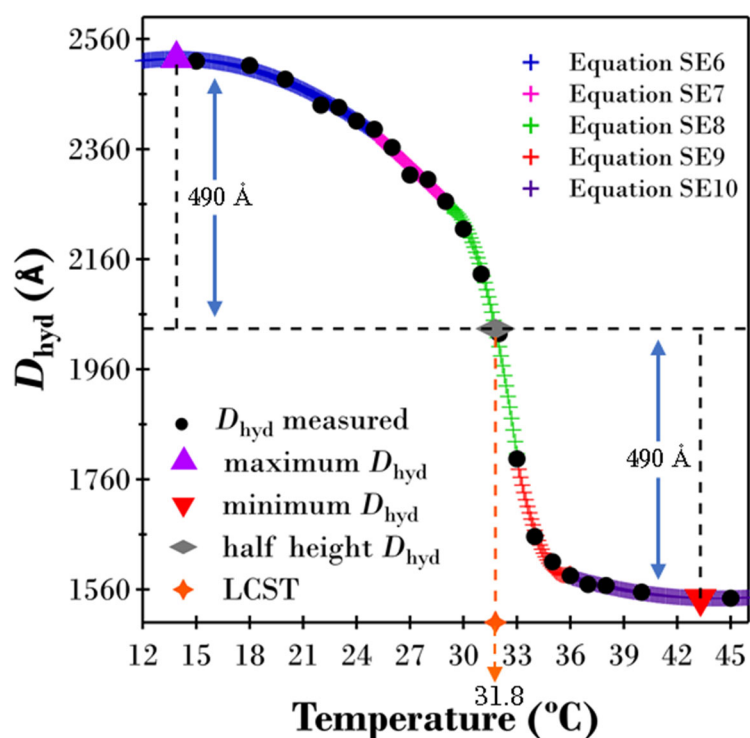

**Figure S3.** Intensity average hydrodynamic diameter ( $D_{\text{hyd}}$ ) as a function of increasing temperature for 1 hr sample. The diameter has been modelled using the five quadratic equations (SE6 to SE10) in Table S1 and 0.1 °C increments to yield the maximum, minimum and mid-point  $D_{\text{hyd}}$  and the LCST.

**Table S1.** Temperature range and equations used for modelling temperature dependent hydrodynamic diameter for 0.5, 1, 2, 4 and 6 hr samples along with the calculated LCST.

| Sample        | Temperature range (°C) | Equation | Quadratic formula                   | R <sup>2</sup> | LCST (°C)    |
|---------------|------------------------|----------|-------------------------------------|----------------|--------------|
| <b>0.5 hr</b> | 8 to 24                | SE1      | $y = -0.0732x^2 + 1.7228x + 235.83$ | 0.984          | <b>30.72</b> |
|               | 24 to 29               | SE2      | $y = -0.5286x^2 + 24.689x - 53.383$ | 0.998          |              |
|               | 29 to 33               | SE3      | $y = -1.1071x^2 + 57.773x - 525.98$ | 0.998          |              |
|               | 33 to 35               | SE4      | $y = 1.2x^2 - 85.7x + 1696.6$       | 0.996          |              |
|               | 35 to 46               | SE5      | $y = 0.058x^2 - 5.1511x + 276.44$   | 0.967          |              |
| <b>1 hr</b>   | 8 to 25 (+)            | SE6      | $y = -0.1083x^2 + 2.9978x + 231.68$ | 0.9881         | <b>31.80</b> |
|               | 25 to 29 (+)           | SE7      | $y = -0.0446x^2 - 0.6425x + 282.72$ | 0.9748         |              |
|               | 29 to 33 (+)           | SE8      | $y = -2.7286x^2 + 157.91x - 2058.9$ | 0.9934         |              |
|               | 33 to 36 (+)           | SE9      | $y = 2.9x^2 - 206.92x + 3849.6$     | 0.9898         |              |
|               | 36 to 46 (+)           | SE10     | $y = 0.0573x^2 - 5.0668x + 266.36$  | 0.9686         |              |
| <b>2 hr</b>   | 8 to 28                | SE11     | $y = -0.0742x^2 + 1.4465x + 255.77$ | 0.9853         | <b>31.82</b> |
|               | 28 to 30               | SE12     | $y = -0.4196x^2 + 19.452x + 22.021$ | 0.999          |              |
|               | 30 to 33               | SE13     | $y = -3.45x^2 + 202.75x - 2749.9$   | 0.9984         |              |
|               | 33 to 36               | SE14     | $y = 3.3x^2 - 235.76x + 4369.6$     | 0.9948         |              |
|               | 36 to 46               | SE15     | $y = 0.0512x^2 - 4.6177x + 258.35$  | 0.97           |              |
| <b>4 hr</b>   | 8 to 25                | SE16     | $y = -0.1368x^2 + 4.0209x + 246.45$ | 0.982          | <b>32.23</b> |
|               | 25 to 30               | SE17     | $y = -0.2625x^2 + 10.537x + 162.75$ | 0.986          |              |
|               | 30 to 34               | SE18     | $y = -2.95x^2 + 171.33x - 2241.9$   | 0.999          |              |
|               | 34 to 36               | SE19     | $y = 1.4x^2 - 102.9x + 2053.4$      | 0.989          |              |
|               | 36 to 46               | SE20     | $y = 0.0656x^2 - 5.8627x + 289.79$  | 0.968          |              |
| <b>6 hr</b>   | 8 to 24                | SE21     | $y = -0.0832x^2 + 1.4971x + 291.29$ | 0.9974         | <b>32.23</b> |
|               | 24 to 30               | SE22     | $y = -0.2851x^2 + 11.608x + 165.35$ | 0.9970         |              |
|               | 30 to 34               | SE23     | $y = -4.2714x^2 + 254.35x - 3529.7$ | 0.9997         |              |
|               | 34 to 37               | SE24     | $y = 1.725x^2 - 126.63x + 2491.5$   | 0.9989         |              |
|               | 37 to 46               | SE25     | $y = 0.0734x^2 - 6.4359x + 305.19$  | 0.9592         |              |

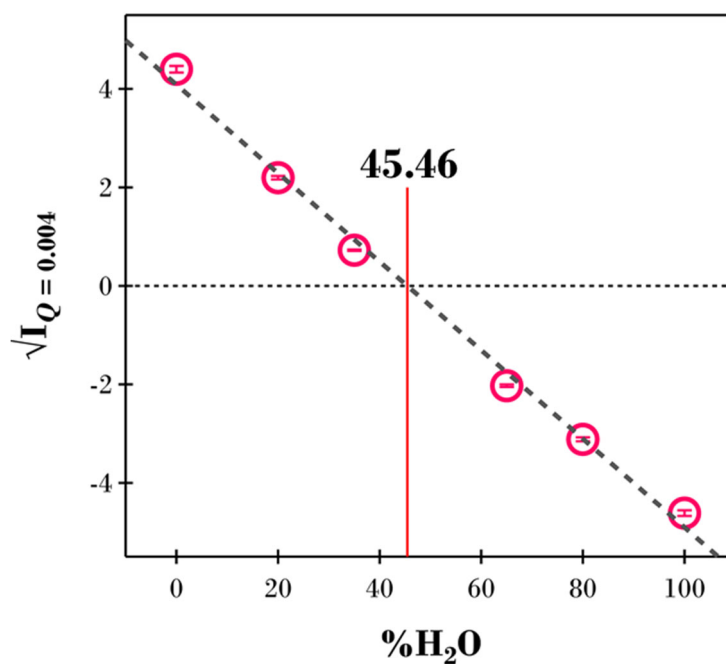

**Figure S4.** Contrast match results for PNIPAM brush modified particles at 18 °C with the square root of intensity ( $I$ ) at  $Q = 0.004$  plotted as a function of the % of  $H_2O$  in  $H_2O/D_2O$  mixture. Red vertical line indicates %  $H_2O$  at contrast matched point for the silica core (45.46%).

### Preparation of SANS samples

~0.05 g of wet PNIPAM brush modified particles (approximately 50% solvent) were dispersed in 10 mL of a  $H_2O/D_2O$  solvent mixture containing 47%  $H_2O$ . The SLD of the solvent was determined during the fitting process to be  $2.9 \times 10^{-6} \text{ \AA}^{-2}$  indicating slightly more  $H_2O$  (50%) in the mixture than expected, which is ascribed to the remaining  $H_2O$  in the initial wet polymer brush modified particles. The SLD of the particles was determined to be  $3.2 \times 10^{-6} \text{ \AA}^{-2}$  which is in good agreement with Figure S4 (45.5%  $H_2O$  in the solvent mixture). The core particle radius was determined to be 650  $\text{\AA}$ .

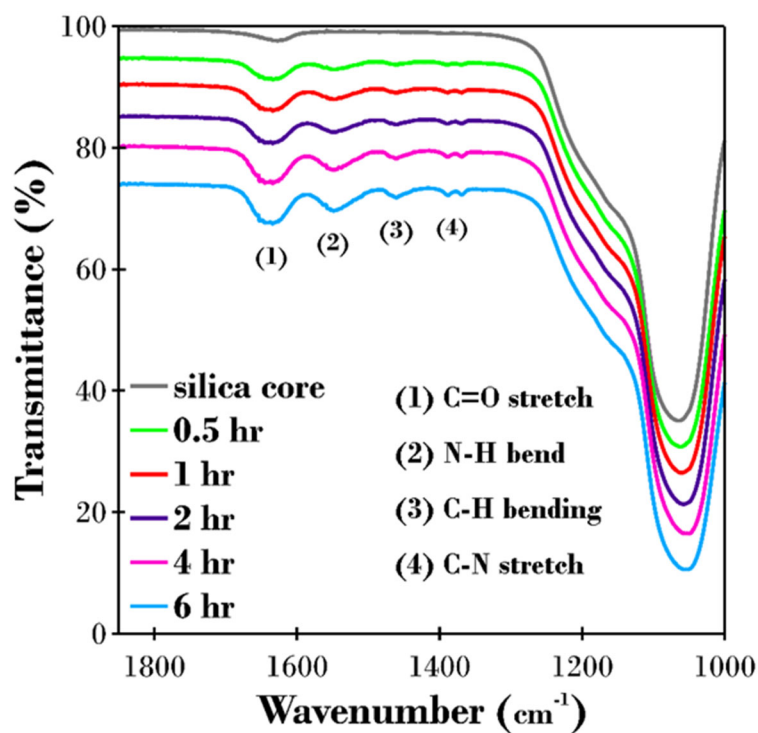

**Figure S5.** FTIR spectra of unmodified silica core particles, and the series of PNIPAM brush modified particles, showing the increase of peaks associated with the PNIPAM brush layer as a function of synthesis time. Data have been normalised to the SiO<sub>2</sub> peak at 1060 cm<sup>-1</sup> and vertically offset for clarity.

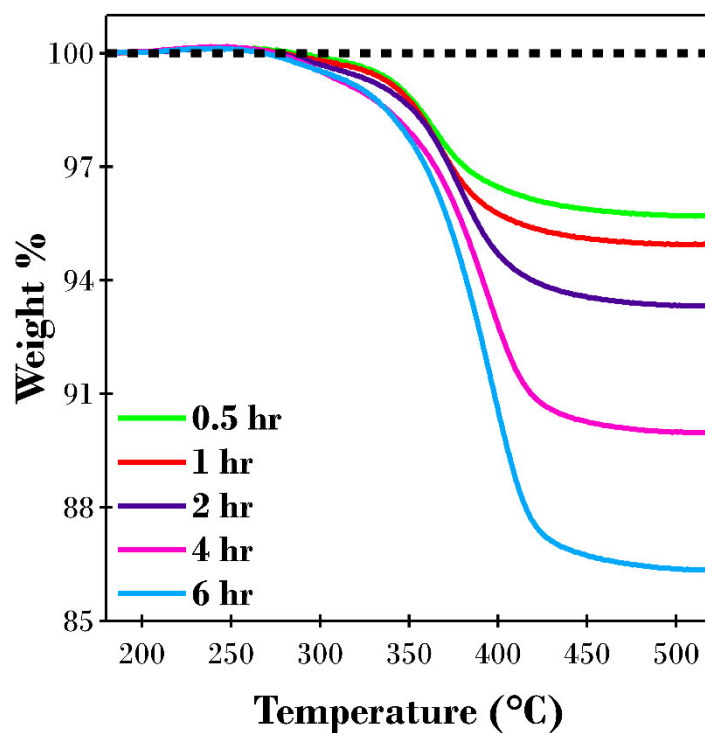

**Figure S6.** Percentage weight loss as a function of temperature for the series of PNIPAM brush modified particles (data normalised to the silica core at 180 °C to ensure all weight loss is due to the PNIPAM shell).

## SasView sphere onion model description<sup>2,3</sup>

This model provides the form factor,  $P(q)$ , for a multi-shell sphere where the scattering length density (SLD) of each shell is described by an exponential, linear, or constant function. The form factor is normalised by the volume of the sphere where the SLD is not identical to the SLD of the solvent. The *radius* represents the core radius  $r_0$  and *thickness*[ $k$ ] represents the thickness of the shell,  $r_{k+1} - r_k$ .

**Table S2.** Sphere onion model parameters with a description.

| <b>Parameter</b>    | <b>Description</b>                                   | <b>units</b>                     |
|---------------------|------------------------------------------------------|----------------------------------|
| n_shells            | number of shells                                     | none                             |
| scale               | source intensity                                     | none                             |
| background          | source background                                    | cm <sup>-1</sup>                 |
| sld_solvent         | solvent scattering length density                    | 10 <sup>-6</sup> Å <sup>-2</sup> |
| sld_core            | core scattering length density                       | 10 <sup>-6</sup> Å <sup>-2</sup> |
| radius_core         | radius of core                                       | Å                                |
| sld_in[n_shells]    | scattering length density at inner radius of shell k | 10 <sup>-6</sup> Å <sup>-2</sup> |
| sld_out[n_shells]   | scattering length density at outer radius of shell k | 10 <sup>-6</sup> Å <sup>-2</sup> |
| thickness[n_shells] | thickness of shell k                                 | Å                                |
| A[n_shells]         | decay rate of scattering length density for shell k  | Å <sup>-1</sup>                  |

## Definition

The 1D scattering intensity is calculated in the following way

$$P(q) = [f]^2/V_{\text{particle}}$$

where

$$f = f_{\text{core}} + \left( \sum_{\text{shell}=1}^N f_{\text{shell}} \right) + f_{\text{solvent}}$$

The shells are spherically symmetric with particle density  $\rho(r)$  and constant SLD within the core and solvent, so

$$f_{\text{core}} = 4\pi \int_0^{r_{\text{core}}} \rho_{\text{core}} \frac{\sin(qr)}{qr} r^2 dr$$

$$f_{\text{shell}} = 4\pi \int_{r_{\text{shell}-1}}^{r_{\text{shell}}} \rho_{\text{shell}}(r) \frac{\sin(qr)}{qr} r^2 dr$$

$$f_{\text{solvent}} = 4\pi \int_{r_N}^{\infty} \rho_{\text{solvent}} \frac{\sin(qr)}{qr} r^2 dr$$

and the volume is  $V(r) = \frac{4\pi}{3} r^3$ . The volume of the particle is determined by the outer shell, so  $V_{\text{particle}} = V(r_N)$ .

The SLD of a shell is therefore defined by

$$\rho_{\text{shell}}(r) = B \exp(A(r - r_{\text{shell}-1})/\Delta t_{\text{shell}}) + C \text{ for } A \neq 0$$

where  $B = \frac{\rho_{\text{out}} - \rho_{\text{in}}}{e^A - 1}$  and  $C = \frac{\rho_{\text{in}} e^A - \rho_{\text{out}}}{e^A - 1}$

This function becomes linear as  $A_{\text{shell}}$  approaches 0.



**Table S3.** SasView parameters used for modelling SANS data for the 2 hr PNIPAM brush modified sample as a function of temperature presented in Figure 5.

| <b>2 hr sample</b>         |           |           |           |             |           |
|----------------------------|-----------|-----------|-----------|-------------|-----------|
| <b>temperature (°C)</b>    | <b>18</b> | <b>25</b> | <b>30</b> | <b>32.5</b> | <b>40</b> |
| <b>scale</b>               | 0.0450    | 0.0418    | 0.0333    | 0.00704     | 0.00260   |
| <b>background</b>          | 0.41      | 0.41      | 0.41      | 0.41        | 0.42      |
| <b>sld_solvent</b>         | 2.9       | 2.9       | 2.9       | 2.9         | 2.9       |
| <b>sld_core</b>            | 3.2       | 3.2       | 3.2       | 3.2         | 3.2       |
| <b>radius_core</b>         | 650       | 650       | 650       | 650         | 650       |
| <b>sld_in1</b>             | 3.2       | 3.2       | 3.2       | 3.2         | 3.2       |
| <b>sld_out1</b>            | 2.3       | 2.2       | 2         | 1.7         | 1.65      |
| <b>thickness 1 (Å)</b>     | 20        | 20        | 20        | 20          | 20        |
| <b>A1</b>                  | -10       | -10       | -10       | -10         | -10       |
| <b>sld_in2</b>             | 2.3       | 2.2       | 2         | 1.7         | 1.65      |
| <b>sld_out2</b>            | 2.4       | 2.4       | 2.5       | 2.7         | 2.6       |
| <b>thickness 2 (Å)</b>     | 39.738    | 50        | 68        | 80          | 105       |
| <b>A2</b>                  | 1         | 1         | 2         | 8           | 8         |
| <b>sld_in3</b>             | 2.4       | 2.4       | 2.5       | 2.7         | 2.6       |
| <b>sld_out3</b>            | 2.9       | 2.9       | 2.9       | 2.9         | 2.9       |
| <b>thickness 3 (Å)</b>     | 3678.5    | 3479.8    | 3000      | 1450        | 900       |
| <b>A3</b>                  | -14.43    | -15       | -12.5     | -5          | -14       |
| <b><math>\chi^2</math></b> | 1.174     | 1.339     | 1.777     | 1.440       | 2.135     |

**Table S4.** SasView parameters used for modelling SANS data for the 6 hr PNIPAM brush modified sample as a function of temperature presented in Figure 5.

| <b>6 hr sample</b>         |           |           |           |             |           |
|----------------------------|-----------|-----------|-----------|-------------|-----------|
| <b>temperature (°C)</b>    | <b>18</b> | <b>25</b> | <b>30</b> | <b>32.5</b> | <b>40</b> |
| <b>scale</b>               | 0.0467    | 0.0327    | 0.0307    | 0.00852     | 0.00100   |
| <b>background</b>          | 0.42      | 0.42      | 0.43      | 0.43        | 0.43      |
| <b>sld_solvent</b>         | 2.9       | 2.9       | 2.9       | 2.9         | 2.9       |
| <b>sld_core</b>            | 3.2       | 3.2       | 3.2       | 3.2         | 3.2       |
| <b>radius_core</b>         | 650       | 650       | 650       | 650         | 650       |
| <b>sld_in1</b>             | 3.2       | 3.2       | 3.2       | 3.2         | 3.2       |
| <b>sld_out1</b>            | 2.3       | 2.2       | 2.035     | 1.8         | 1.65      |
| <b>thickness 1 (Å)</b>     | 20        | 20        | 20        | 20          | 20        |
| <b>A1</b>                  | -10       | -10       | -10       | -10         | -10       |
| <b>sld_in2</b>             | 2.3       | 2.2       | 2.035     | 1.8         | 1.65      |
| <b>sld_out2</b>            | 2.5       | 2.4       | 2.43      | 2.6         | 2.6       |
| <b>thickness 2 (Å)</b>     | 160       | 118       | 97        | 120         | 170       |
| <b>A2</b>                  | 0.5       | 1         | 1.8       | 5           | 8         |
| <b>sld_in3</b>             | 2.5       | 2.4       | 2.43      | 2.6         | 2.6       |
| <b>sld_out3</b>            | 2.9       | 2.9       | 2.9       | 2.9         | 2.9       |
| <b>thickness 3 (Å)</b>     | 3500      | 3083.7    | 2800      | 1487.4      | 917.71    |
| <b>A3</b>                  | -10       | -10.5     | -9        | -4.065      | -15       |
| <b><math>\chi^2</math></b> | 1.494     | 1.841     | 2.835     | 1.250       | 2.053     |

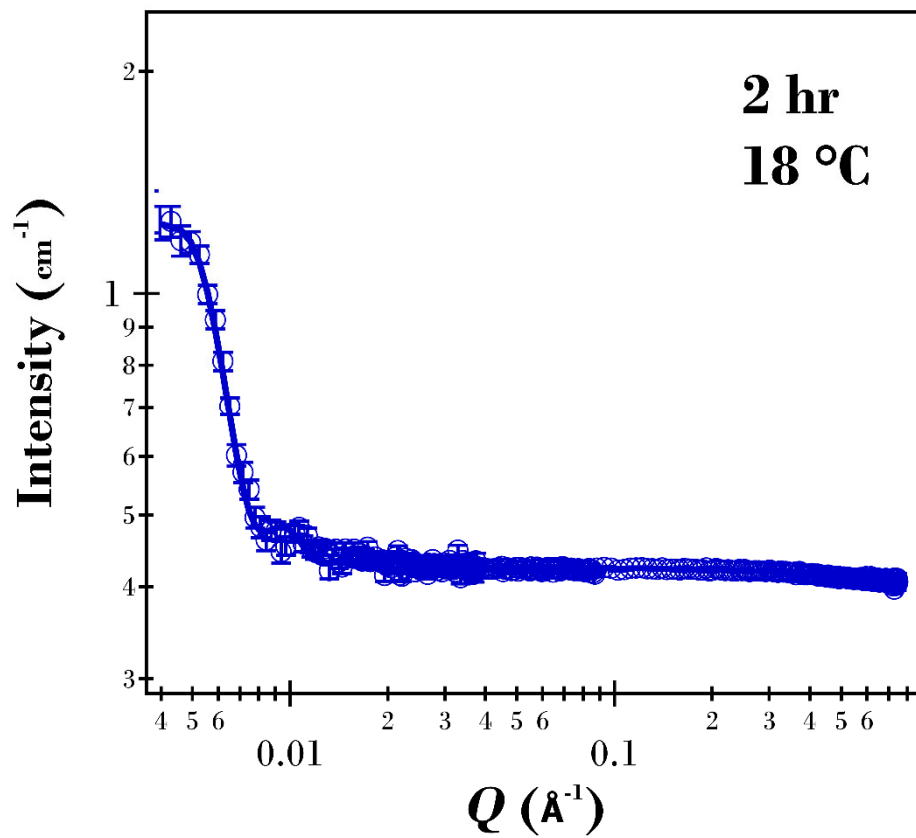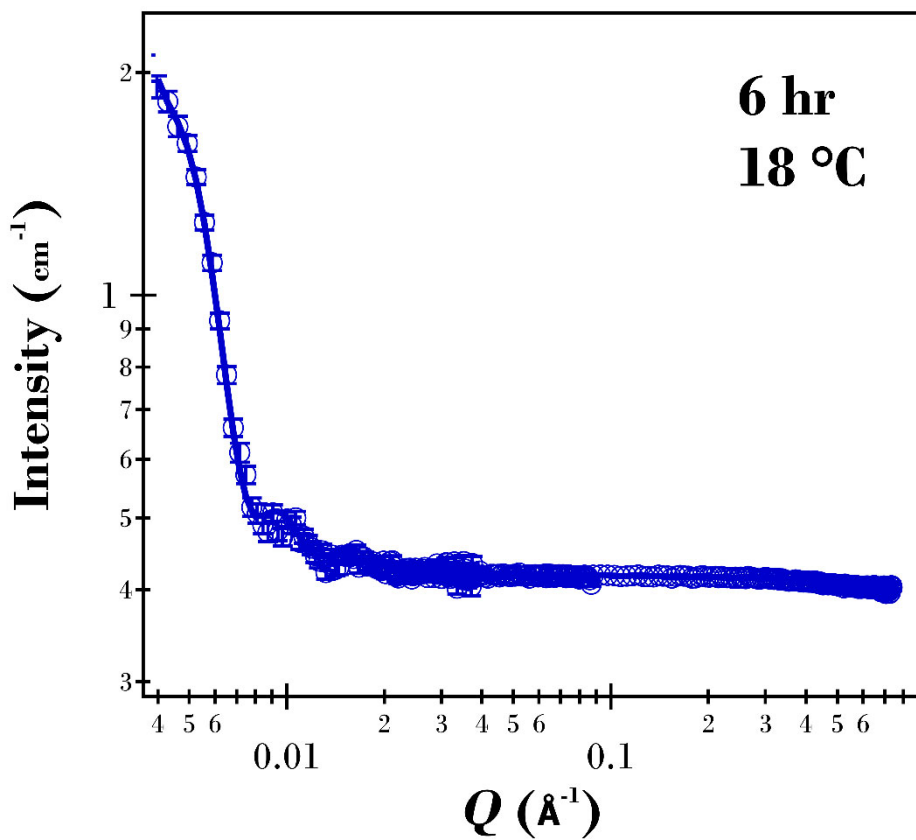

**Figure S7.** SANS data with fit for (top) 2 hr and (bottom) 6 hr samples at 18 °C for full  $Q$  range between 0.004 and 0.75  $\text{\AA}^{-1}$

## References

1. B. A. Humphreys, E. J. Wanless and G. B. Webber, *Journal of Colloid and Interface Science*, 2018, **516**, 153-161.
2. M. Doucet, J. H. Cho, G. Alina, J. Bakker, W. Bouwman, P. Butler, K. Campbell, M. Gonzales, R. Heenan, A. Jackson, P. Juhas, S. King, P. Kienzle, J. Krzywon, A. Markvardsen, T. Nielsen, L. O'Driscoll, W. Potrzebowski, R. Ferraz Leal, T. Richter, P. Rozycko and A. Washington, (2017, March 25) SasView version 4.1. Zenodo, <https://doi.org/10.5281/zenodo.438138>, DOI: (10.5281/zenodo.438138).
3. L. A. Feigin and D. I. Svergun, *Structure Analysis by Small-Angle X-Ray and Neutron Scattering*, Plenum Press, New York, 1987.
